# Supplementary material for: A ratiometric fluorescent probe based on a dual-ligand lanthanide metal–organic framework (MOF) for sensitive detection of aluminium and fluoride ions in river and tap water
Source: Royal Society of Chemistry journal article supplement (doi:10.1039/d2qi02554j), 2023-01-01
Supplement: d2qi02554j1.pdf [file d2qi02554j1.pdf]

## Supplementary Information

# Ratiometric Fluorescence Probe based on Dual-Ligand Lanthanide Metal-Organic Framework (MOF) for Sensitive Detection of Aluminium and Fluoride Ions in River and Tap Water

**Runnan Wang<sup>a,c</sup>, Hao Zhang<sup>c</sup>, Sibao Wang<sup>a</sup>, Fanxu Meng<sup>d</sup>, Jing Sun<sup>\*,b</sup>, Dawei Lou<sup>c</sup>, Zhongmin Su<sup>\*,b</sup>**

*<sup>a</sup> School of Materials science and Engineering, Changchun University of Science and Technology, Changchun, 130022, People's Republic of China.*

*<sup>b</sup> School of Chemistry and Environmental Engineering, Changchun University of Science and Technology, Jilin Provincial Science and Technology Innovation Center of Optical Materials and Chemistry, Jilin Provincial International Joint Research Center of Photo functional Materials and Chemistry, Changchun, 130022, People's Republic of China.*

*<sup>c</sup> Department of Analytical Chemistry, Jilin Institute of chemical Technology, Financial support from the Key Laboratory of Fine Chemicals of Jilin Province is also acknowledged, Jilin, 132022, PR China.*

*<sup>d</sup> Center of Characterization and Analysis, Jilin Institute of Chemical Technology, Jilin, 132022, PR China.*

\*correspondence: sj-cust@126.com; zmsu@nenu.edu.cn

## Materials and measurement

2-Aminoterephthalic acid (BDC-NH<sub>2</sub>), 2,5-Thiophenedicarboxylic acid (TDA) and N,N-Dimethylacetamide (DMA), Metal salts (Eu(NO<sub>3</sub>)<sub>3</sub>·6H<sub>2</sub>O, Al(NO<sub>3</sub>)<sub>3</sub>·9H<sub>2</sub>O, Ca(NO<sub>3</sub>)<sub>2</sub>·4H<sub>2</sub>O, Cu(NO<sub>3</sub>)<sub>2</sub>·2.5H<sub>2</sub>O, Co(NO<sub>3</sub>)<sub>2</sub>·6H<sub>2</sub>O, Zn(NO<sub>3</sub>)<sub>2</sub>·6H<sub>2</sub>O, Fe(NO<sub>3</sub>)<sub>3</sub>·9H<sub>2</sub>O, Fe(NO<sub>3</sub>)<sub>2</sub>·6H<sub>2</sub>O, Ni(NO<sub>3</sub>)<sub>2</sub>·6H<sub>2</sub>O, Cr(NO<sub>3</sub>)<sub>3</sub>·9H<sub>2</sub>O, KNO<sub>3</sub>, NaNO<sub>3</sub>, NH<sub>4</sub>NO<sub>3</sub>, Pb(NO<sub>3</sub>)<sub>2</sub>·3H<sub>2</sub>O, Hg(NO<sub>3</sub>)<sub>2</sub>·5H<sub>2</sub>O, AgNO<sub>3</sub>·9H<sub>2</sub>O, KF, KCl, KBr and KI) were purchased from Aladdin BioChem Technology Co. Ltd. Shanghai, China. All the chemicals were commercially purchased and used without further purification.

Fluorescence spectrum analyses were performed on a HORIBA Fluoromax TCSPC fluorescence spectrometer. Powder X-ray diffraction (XRD) of the MOF samples were performed by using a Bruker D8 apparatus equipped with Cu  $\alpha$  radiation and recorded in the 2 $\theta$  range of 5–60° under room conditions. The simulated powder patterns of Eu-BDC-NH<sub>2</sub>/TDA were calculated using Mercury 3.8 via CIF files. A Thermo Fisher Scientific Cahn thermogravimetric analyzer apparatus was implemented with a heating rate of 5 °C/min from room temperature to 800 °C under a N<sub>2</sub> atmosphere to determine the TGA curves of the MOF. Fourier transform infrared (FT-IR) spectroscopy was conducted on a Thermo Fisher Scientific Nicolet iS 50 spectrometer in the range of 4000-400 cm<sup>-1</sup> with a powder sample on a KBr pellets. X-ray photoelectron spectra (XPS) was collected on a Thermo Fisher Scientific ESCALAB 250XI device. N<sub>2</sub> adsorption-desorption isotherms were carried out by Micromeritics ASAP2020. The single crystal X-ray was measured on a Bruker APEX-II CCD diffractometer with graphite monochromatic Mo K $\alpha$  radiation at 298 K, and the structure was solved by direct method and refined with the full matrix least-squares method on F2 embedded in SHELXTL program through using the Olex2 as the graphical interface. All hydrogen atoms were placed geometrically in ideal positions with a riding model, and all non-hydrogen atoms were refined by the anisotropic thermal parameters during the final cycles.

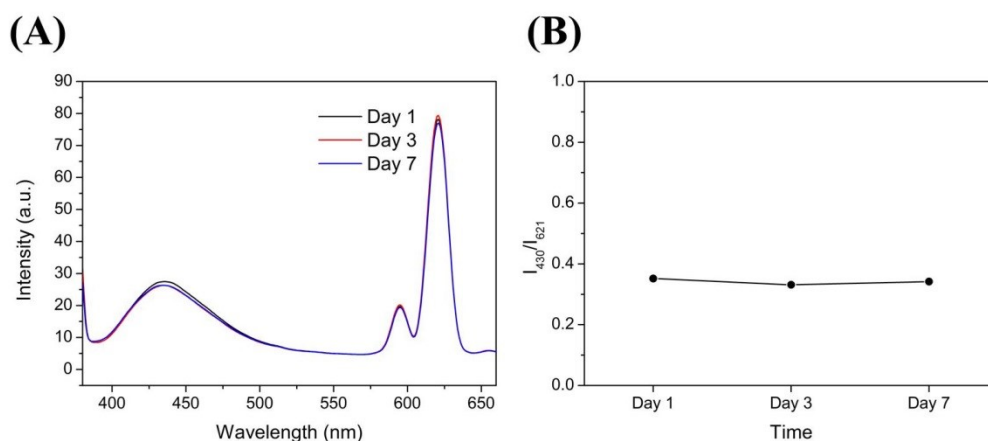

Fig.S1. (A) Fluorescence spectra and the fluorescence intensity ratio of I<sub>430</sub>/I<sub>621</sub> (B) of Eu-BDC-NH<sub>2</sub>/TDA stored in room temperature within seven days.

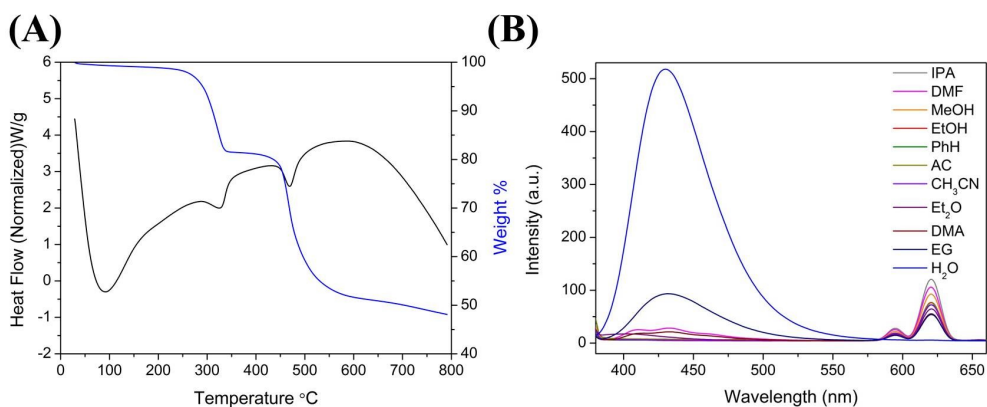

Fig.S2. (A) Thermogravimetric analysis of Eu-BDC-NH<sub>2</sub>/TDA. (B) Luminescence intensity of Eu-BDC-NH<sub>2</sub>/TDA dispersed in different solvents.

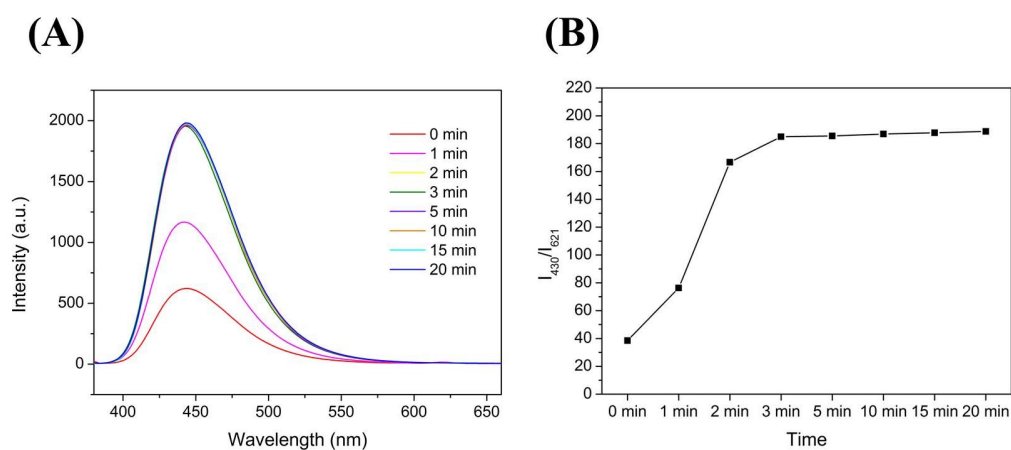

Fig.S3. (A) Fluorescence spectra and the fluorescence intensity ratio of  $I_{430}/I_{621}$  (B) of Eu-BDC-NH<sub>2</sub>/TDA towards Al<sup>3+</sup> at different response time.

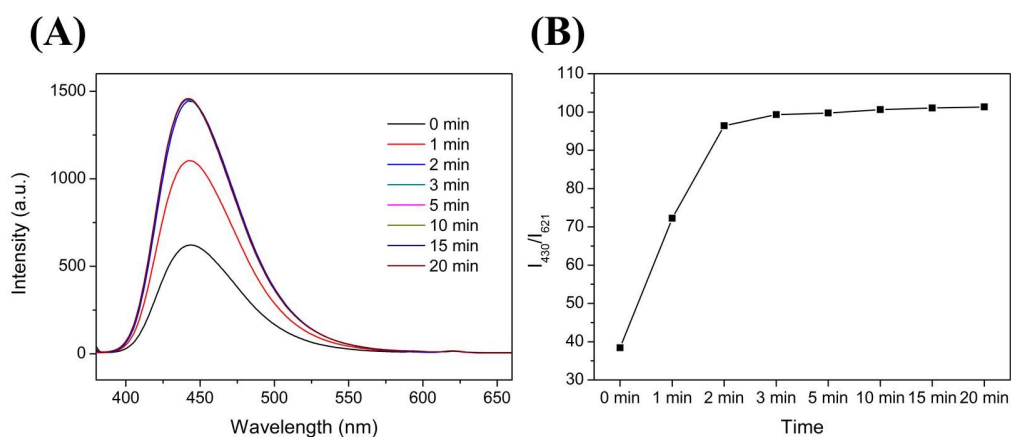

Fig.S4. (A) Fluorescence spectra and the fluorescence intensity ratio of  $I_{430}/I_{621}$  (B) of Eu-BDC-NH<sub>2</sub>/TDA towards F<sup>-</sup> at different response time.

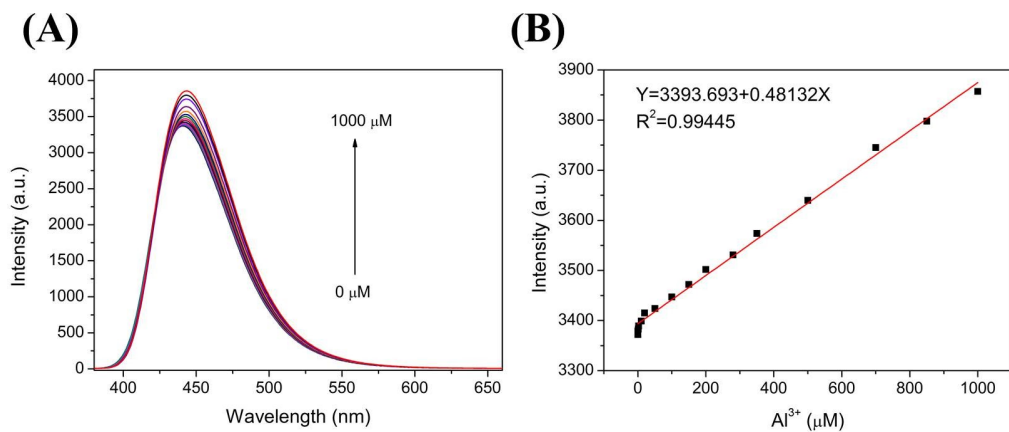

Fig.S5. (A) Fluorescence emission spectra of BDC-NH<sub>2</sub> in the presence of different concentrations of Al<sup>3+</sup>. (B) Linear relationship between the  $I_{430}/I_{621}$  and concentration of Al<sup>3+</sup> in the range of 0–1000  $\mu\text{M}$ .

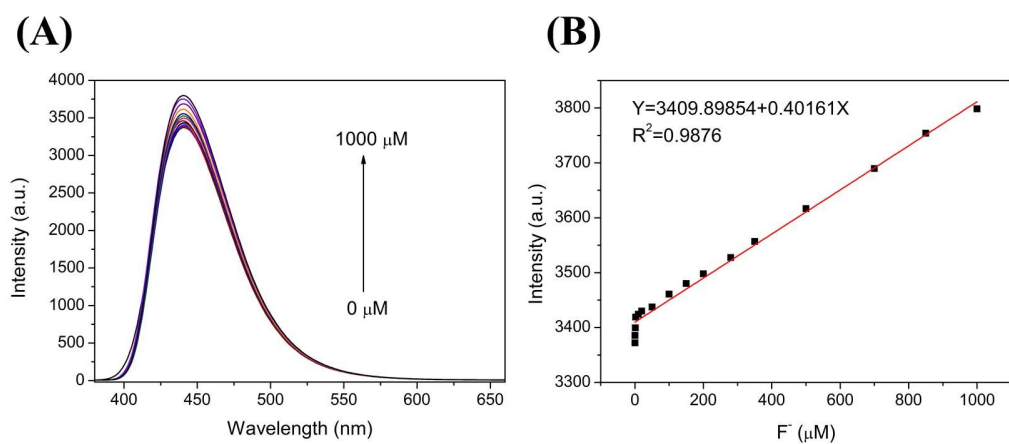

Fig.S6. (A) Fluorescence emission spectra of BDC-NH<sub>2</sub> in the presence of different concentrations of F<sup>-</sup>. (B) Linear relationship between the  $I_{430}/I_{621}$  and concentration of F<sup>-</sup> in the range of 0–1000  $\mu\text{M}$ .

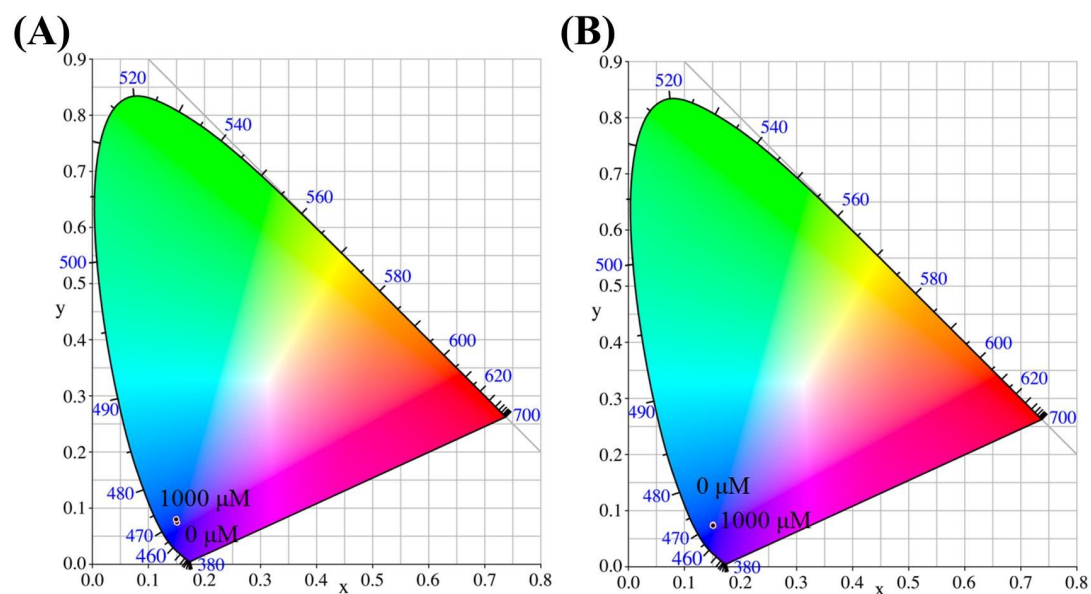

Fig.S7. (A) CIE chromaticity diagram of BDC-NH<sub>2</sub> in the presence of different concentrations of Al<sup>3+</sup> and F<sup>-</sup> (B) from 0 to 1000 μM.

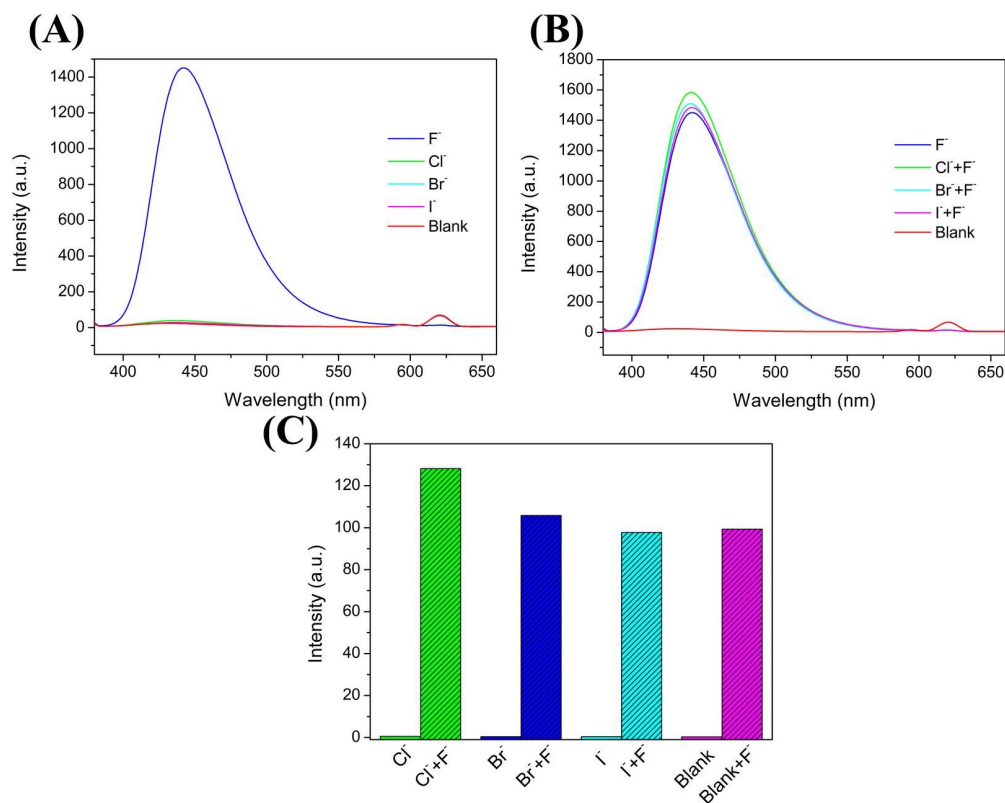

Fig.S8. (A) The fluorescence of Eu-BDC-NH<sub>2</sub>/TDA responding to different halide ion. (B) The fluorescence of Eu-BDC-NH<sub>2</sub>/TDA responding to F<sup>-</sup> with other different halide ion as the interference. (C) The fluorescence intensity of I<sub>430</sub>/I<sub>621</sub> of Eu-BDC-NH<sub>2</sub>/TDA and treated with various halide ion and the coexistence of F<sup>-</sup>.

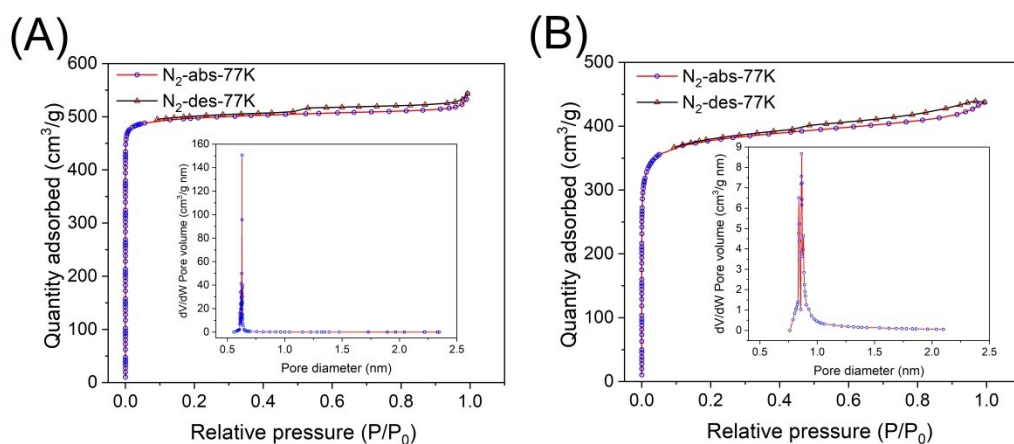

Fig.S9. (A) N<sub>2</sub> adsorption-desorption isotherms of Eu-BDC-NH<sub>2</sub>/TDA and (B) Al@Eu-BDC-NH<sub>2</sub>/TDA. Inset: the pore size distributions.

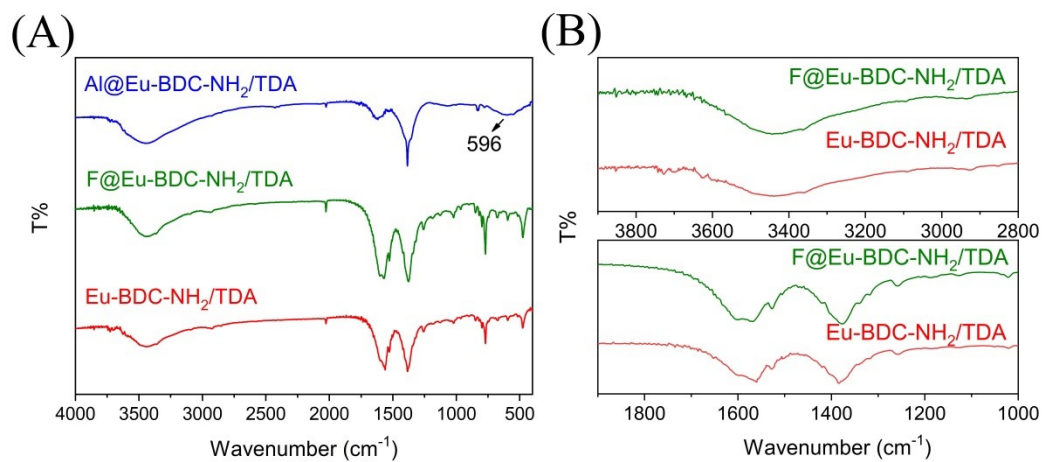

Fig.S10. FT-IR spectra of Eu-BDC-NH<sub>2</sub>/TDA, Al@Eu-BDC-NH<sub>2</sub>/TDA and F@Eu-BDC-NH<sub>2</sub>/TDA.

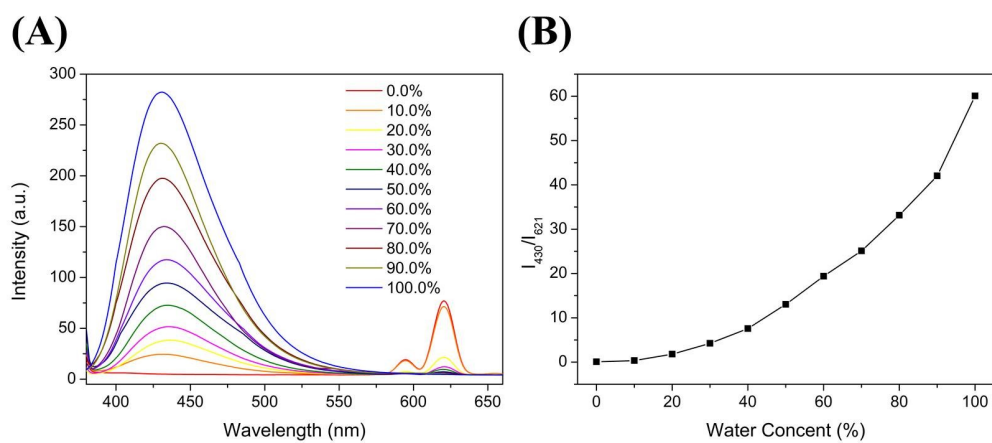

Fig.S11. (A) Emission spectra of Eu-BDC-NH<sub>2</sub>/TDA in ethanol with different content of water. (B) Change of the  $I_{430}/I_{621}$  upon the increase of water concentration.

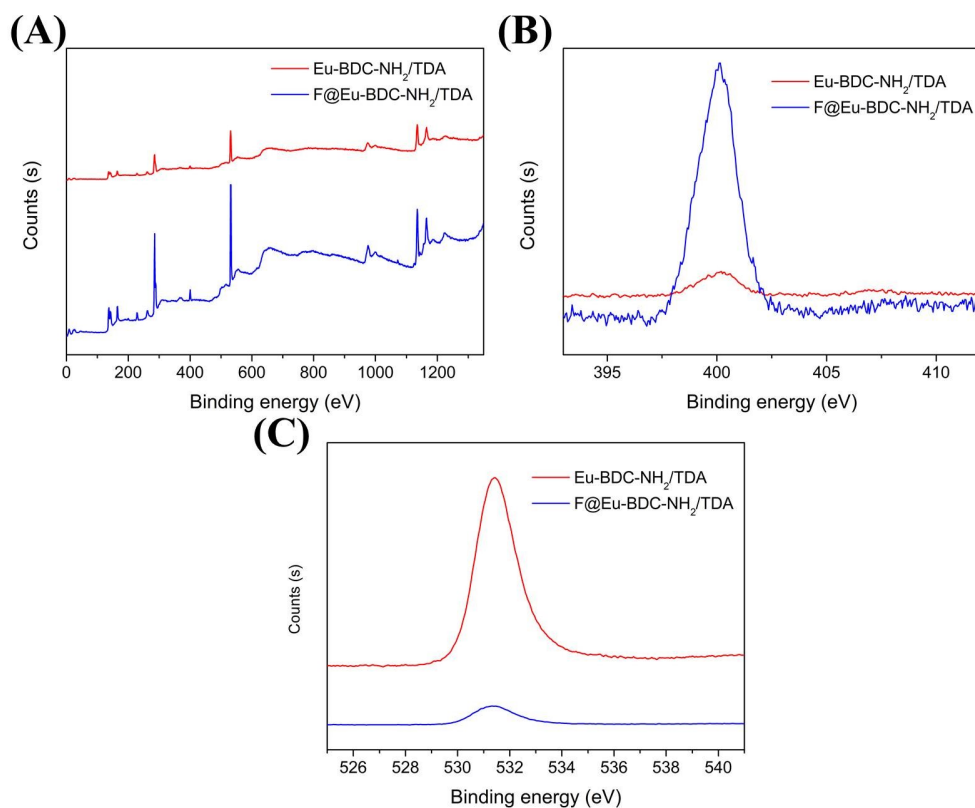

Fig. S12. (A) XPS spectra for Eu-BDC-NH<sub>2</sub>/TDA and F@Eu-BDC-NH<sub>2</sub>/TDA. (B) XPS spectra for N 1s in Eu-BDC-NH<sub>2</sub>/TDA and F@Eu-BDC-NH<sub>2</sub>/TDA. (C) XPS spectra for O 1s in Eu-BDC-NH<sub>2</sub>/TDA and F@Eu-BDC-NH<sub>2</sub>/TDA.

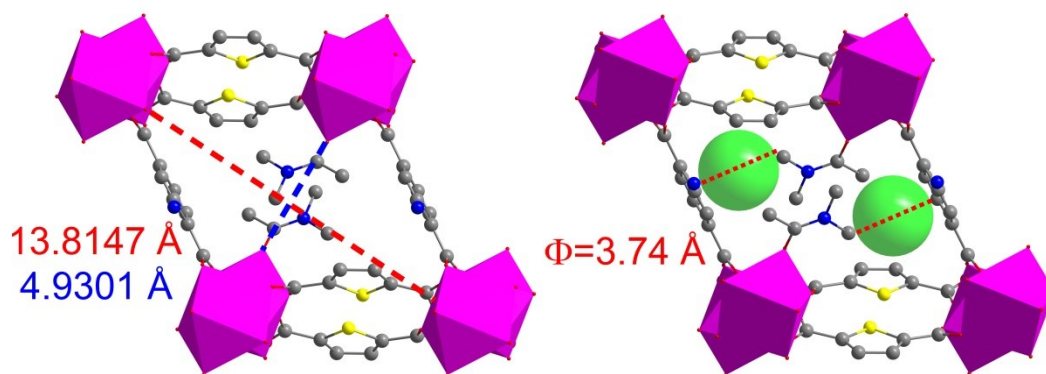

Fig. S13. The schematic diagram of the aperture measurement of Eu-BDC-NH<sub>2</sub>/TDA

Table S1 Crystal data and structure refinement for Eu-BDC-NH<sub>2</sub>/TDA

|                   |                                                                     |
|-------------------|---------------------------------------------------------------------|
| Empirical formula | C <sub>14</sub> H <sub>13</sub> EuN <sub>1.5</sub> O <sub>7</sub> S |
| Formula weight    | 498.28                                                              |
| Temperature/K     | 296.15                                                              |
| Crystal system    | triclinic                                                           |
| Space group       | P-1                                                                 |
| a/Å               | 8.967(6)                                                            |
| b/Å               | 10.323(7)                                                           |

|                                             |                                                               |
|---------------------------------------------|---------------------------------------------------------------|
| c/Å                                         | 10.471(7)                                                     |
| $\alpha$ /°                                 | 115.226(8)                                                    |
| $\beta$ /°                                  | 91.750(8)                                                     |
| $\gamma$ /°                                 | 109.208(8)                                                    |
| Volume/Å <sup>3</sup>                       | 811.4(10)                                                     |
| Z                                           | 2                                                             |
| $\rho_{\text{calc}}/\text{cm}^3$            | 2.040                                                         |
| $\mu/\text{mm}^{-1}$                        | 4.032                                                         |
| F(000)                                      | 485.0                                                         |
| Radiation                                   | MoK $\alpha$ ( $\lambda = 0.71073$ )                          |
| 2 $\Theta$ range for data collection/°      | 4.388 to 55.254                                               |
| Index ranges                                | $-11 \leq h \leq 11, -8 \leq k \leq 13, -13 \leq l \leq 13$   |
| Reflections collected                       | 4664                                                          |
| Independent reflections                     | 3628 [ $R_{\text{int}} = 0.0242, R_{\text{sigma}} = 0.0572$ ] |
| Data/restraints/parameters                  | 3628/22/230                                                   |
| Goodness-of-fit on F <sup>2</sup>           | 1.054                                                         |
| Final R indexes [ $I \geq 2\sigma(I)$ ]     | $R_1 = 0.0450, wR_2 = 0.1095$                                 |
| Final R indexes [all data]                  | $R_1 = 0.0570, wR_2 = 0.1162$                                 |
| Largest diff. peak/hole / e Å <sup>-3</sup> | 2.16/-1.03                                                    |

Table S2. Bond lengths [Å] and angles [°] for compound Eu-BDC-NH<sub>2</sub>/TDA

| Atom | Atom  | Length/Å  |
|------|-------|-----------|
| Eu1  | Eu1#1 | 4.047(2)  |
| Eu1  | O1#2  | 2.381(5)  |
| Eu1  | O2#3  | 2.381(5)  |
| Eu1  | O3#4  | 2.358(5)  |
| Eu1  | O4    | 2.311(5)  |
| Eu1  | O4#1  | 2.877(6)  |
| Eu1  | O5#1  | 2.389(6)  |
| Eu1  | O6    | 2.372(6)  |
| Eu1  | O7    | 2.286(6)  |
| Eu1  | C2#1  | 3.018(8)  |
| S1   | C3    | 1.710(7)  |
| S1   | C4    | 1.710(7)  |
| O1   | C1    | 1.254(9)  |
| O2   | C1    | 1.246(9)  |
| O3   | C6    | 1.237(9)  |
| O4   | C2    | 1.261(9)  |
| O5   | C2    | 1.249(10) |
| O6   | C12   | 1.259(13) |



| Atom | Atom  | Length/Å   |
|------|-------|------------|
| O7   | C6    | 1.278(10)  |
| C1   | C4    | 1.485(9)   |
| C2   | C8    | 1.461(10)  |
| C3   | C6    | 1.476(10)  |
| C3   | C7    | 1.361(11)  |
| C4   | C5    | 1.367(10)  |
| C5   | C7    | 1.390(10)  |
| N1   | C9    | 1.451(12)  |
| N1   | C10   | 1.493(14)  |
| N1   | C12   | 1.259(14)  |
| C8   | C13   | 1.3949(12) |
| C8   | C14   | 1.3948(13) |
| C11  | C12   | 1.567(18)  |
| C13  | C14#5 | 1.059(14)  |
| C13  | N2    | 1.37(3)    |

#1:1-X,-Y,1-Z; #2:1-X,1-Y,1-Z; #3: +X,-1+Y,+Z; #4:-X,-Y,1-Z; #5:1-X,-Y,2-Z

Table S3 Angles [°] for compound Eu-BDC-NH<sub>2</sub>/TDA

| Atom | Atom | Atom  | Angle/°    |
|------|------|-------|------------|
| O1#1 | Eu1  | Eu1#2 | 66.35(14)  |
| O1#1 | Eu1  | O4#2  | 64.07(17)  |
| O1#1 | Eu1  | O5#2  | 79.8(2)    |
| O1#1 | Eu1  | C2#2  | 69.25(19)  |
| O2#3 | Eu1  | Eu1#2 | 66.00(13)  |
| O2#3 | Eu1  | O1#1  | 128.94(19) |
| O2#3 | Eu1  | O4#2  | 66.38(17)  |
| O2#3 | Eu1  | O5#2  | 76.1(2)    |
| O2#3 | Eu1  | C2#2  | 71.08(19)  |
| O3#4 | Eu1  | Eu1#2 | 120.06(15) |
| O3#4 | Eu1  | O1#1  | 149.6(2)   |
| O3#4 | Eu1  | O2#3  | 73.75(19)  |
| O3#4 | Eu1  | O4#2  | 139.31(18) |
| O3#4 | Eu1  | O5#2  | 129.3(2)   |
| O3#4 | Eu1  | O6    | 76.3(2)    |
| O3#4 | Eu1  | C2#2  | 140.8(2)   |
| O4   | Eu1  | Eu1#2 | 44.06(16)  |
| O4#2 | Eu1  | Eu1#2 | 33.95(11)  |
| O4   | Eu1  | O1#1  | 80.9(2)    |
| O4   | Eu1  | O2#3  | 77.68(19)  |
| O4   | Eu1  | O3#4  | 86.2(2)    |

| <b>Atom</b> | <b>Atom</b> | <b>Atom</b> | <b>Angle<sup>°</sup></b> |
|-------------|-------------|-------------|--------------------------|
| O4          | Eu1         | O4#2        | 78.0(2)                  |
| O4          | Eu1         | O5#2        | 125.4(2)                 |
| O4          | Eu1         | O6          | 83.7(2)                  |
| O4#2        | Eu1         | C2#2        | 24.54(18)                |
| O4          | Eu1         | C2#2        | 102.5(2)                 |
| O5#2        | Eu1         | Eu1#2       | 81.46(15)                |
| O5#2        | Eu1         | O4#2        | 47.64(18)                |
| O5#2        | Eu1         | C2#2        | 23.2(2)                  |
| O6          | Eu1         | Eu1#2       | 117.36(16)               |
| O6          | Eu1         | O1#1        | 75.1(2)                  |
| O6          | Eu1         | O2#3        | 145.5(2)                 |
| O6          | Eu1         | O4#2        | 137.24(18)               |
| O6          | Eu1         | O5#2        | 137.6(2)                 |
| O6          | Eu1         | C2#2        | 142.1(2)                 |
| O7          | Eu1         | Eu1#2       | 149.66(17)               |
| O7          | Eu1         | O1#1        | 93.6(2)                  |
| O7          | Eu1         | O2#3        | 120.0(2)                 |
| O7          | Eu1         | O3#4        | 88.9(2)                  |
| O7          | Eu1         | O4#2        | 117.5(2)                 |
| O7          | Eu1         | O4          | 159.4(2)                 |
| O7          | Eu1         | O5#2        | 72.3(2)                  |
| O7          | Eu1         | O6          | 75.7(2)                  |
| O7          | Eu1         | C2#2        | 93.9(2)                  |
| C2#2        | Eu1         | Eu1#2       | 58.48(15)                |
| C4          | S1          | C3          | 92.7(4)                  |
| C1          | O1          | Eu1#1       | 135.4(5)                 |
| C1          | O2          | Eu1#5       | 132.0(4)                 |
| C6          | O3          | Eu1#4       | 135.8(5)                 |
| Eu1         | O4          | Eu1#2       | 102.0(2)                 |
| C2          | O4          | Eu1#2       | 84.0(5)                  |
| C2          | O4          | Eu1         | 173.6(6)                 |
| C2          | O5          | Eu1#2       | 108.0(5)                 |
| C12         | O6          | Eu1         | 147.8(7)                 |
| C6          | O7          | Eu1         | 147.7(6)                 |
| O1          | C1          | C4          | 115.6(7)                 |
| O2          | C1          | O1          | 127.4(7)                 |
| O2          | C1          | C4          | 116.9(6)                 |
| O4          | C2          | Eu1#2       | 71.5(4)                  |
| O4          | C2          | C8          | 121.0(8)                 |

| Atom  | Atom | Atom  | Angle/°   |
|-------|------|-------|-----------|
| O5    | C2   | Eu1#2 | 48.9(4)   |
| O5    | C2   | O4    | 120.0(7)  |
| O5    | C2   | C8    | 119.0(7)  |
| C8    | C2   | Eu1#2 | 166.5(6)  |
| C6    | C3   | S1    | 122.3(6)  |
| C7    | C3   | S1    | 110.7(5)  |
| C7    | C3   | C6    | 126.3(7)  |
| C1    | C4   | S1    | 122.5(5)  |
| C5    | C4   | S1    | 109.7(5)  |
| C5    | C4   | C1    | 127.7(7)  |
| C4    | C5   | C7    | 114.1(7)  |
| O3    | C6   | O7    | 125.6(7)  |
| O3    | C6   | C3    | 118.0(7)  |
| O7    | C6   | C3    | 116.4(7)  |
| C3    | C7   | C5    | 112.8(7)  |
| C9    | N1   | C10   | 118.2(9)  |
| C12   | N1   | C9    | 126.1(12) |
| C12   | N1   | C10   | 115.4(10) |
| C13   | C8   | C2    | 129.3(9)  |
| C14   | C8   | C2    | 122.9(9)  |
| C14   | C8   | C13   | 107.8(9)  |
| O6    | C12  | C11   | 120.3(10) |
| N1    | C12  | O6    | 123.8(13) |
| N1    | C12  | C11   | 115.8(11) |
| C14#6 | C13  | C8    | 128.0(14) |
| C14#6 | C13  | N2    | 118.3(12) |
| N2    | C13  | C8    | 113.6(13) |
| C13#6 | C14  | C8    | 124.1(15) |

#1:1-X,1-Y,1-Z; #2:1-X,-Y,1-Z; #3:+X,-1+Y,+Z; #4:-X,-Y,1-Z; #5:+X,1+Y,+Z; #6:1-X,-Y,2-Z
